# Supplementary material
Source: PubMed Central journal article supplement (PMC4360152)
Supplement: ml500528x_si_001.pdf [file ml500528x_si_001.pdf]

## **Supplementary Material**

### **Farnesyl Diphosphate Synthase Inhibitors With Unique Ligand-Binding Geometries**

Yi-Liang Liu, Rong Cao, Yang Wang and Eric Oldfield\*

Department of Chemistry, University of Illinois at Urbana-Champaign,

600 South Mathews Avenue, Urbana, IL 61801, USA

#### Contents

- 1. Figure S1: Structural representation of diamidine inhibitor 7 bound to HsFPPS**
- 2. Figure S2: X-ray structures of TbFPPS**
- 3. Figure S3: Isothermal titration calorimetry result**
- 4. Expression, purification and crystallization of human and *T. brucei* FPPS**
- 5. Data collection and refinement**
- 6. Chemicals**
- 7. References**

**1. Figure S1: Structural representation of diamidine inhibitor 7 bound to HsFPPS.** (A) Hydrophobic residues close to 7. (B) Electrostatic surface plot showing solvent exposure of the biphenyl group in 7.

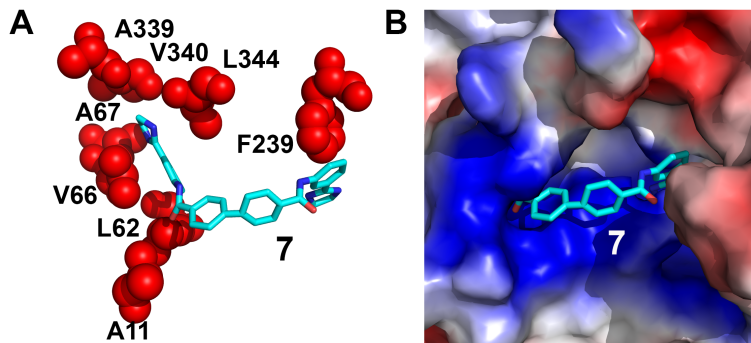

**2. Figure S2: X-ray structures of TbFPPS.** The color codes are as follows: apo-TbFPPS (PDB ID Code 4RYF) in red; TbFPPS•8 (PDB ID Code 4RXC) in green; TbFPPS•2 (PDB ID Code 4RXD) in purple; TbFPPS•9 (PDB ID Code 4RXE) in pink.

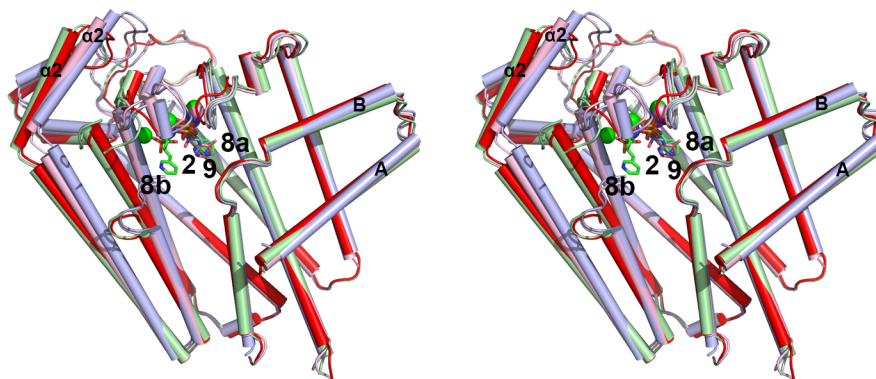

**3. Figure S3:** (A) ITC data for **8** binding to TbFPPS. (B) Fitting curve for **8** binding to TbFPPS.

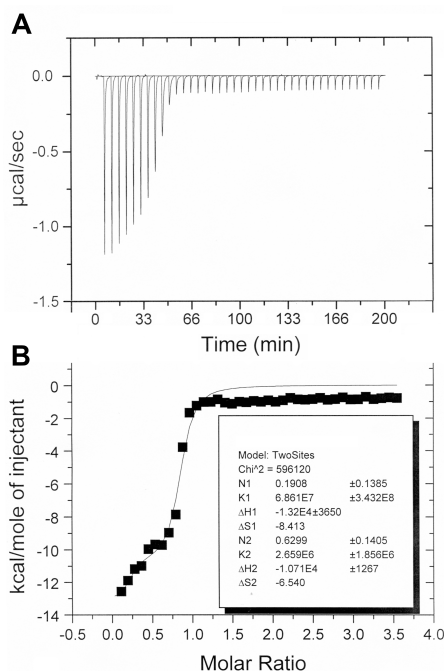

#### 4. Expression, purification and crystallization of human and *T. brucei* FPPS

Expression and purification of human and *T. brucei* FPPS were carried out as described previously.<sup>1,2</sup> Crystallization of human FPPS with diamidine **7** was performed by adding 3 mg of **7** to 1 mg/mL purified human FPPS. After incubating for 2 days, the mixture was concentrated to 20 mg/mL by using a 30 kDa Amicon. The final co-crystallization was carried out by mixing 2  $\mu\text{L}$  of the concentrated human FPPS/**7** mixture with 2  $\mu\text{L}$  of precipitant (1.2 M Na/K phosphate buffer, pH 5.6 and 25% glycerol) in the presence of 1 mM geranyl diphosphate. Crystals appeared within 2 days and grew to full size within a week at 20°C. Crystals were collected, mounted and stored in liquid nitrogen. Crystallization of *T. brucei* FPPS with compounds **2**, **8**, **9** was carried out as described previously.<sup>3</sup>

## 5. Data collection and refinement

Diffraction data were collected at the Life Science Collaborative Team (LS-CAT) beamline 21-ID at the Advanced Photon Source, Argonne National Laboratory. Complete crystallographic results are shown in Table 1. Data were processed by using HKL3000<sup>4</sup> (human FPPS) or HKL2000<sup>5</sup> (TbFPPS). For human FPPS, phases were obtained by using molecular replacement with a human FPPS structure (PDB ID code 2F8Z). The solution was found and the subsequent refinement was carried out in CCP4<sup>6</sup> and Coot<sup>7</sup>. For *T. brucei* FPPS, final phase solutions were obtained by searching against a reported *T. brucei* FPPS structure (PDB ID code 2OGD). These modeled structures were then refined by using CCP4,<sup>6</sup> CNS<sup>8,9</sup> and Coot.<sup>7</sup> Structural Figures were generated by using PyMOL.<sup>10</sup>

## 6. Chemicals

Inhibitors were from the batches whose synthesis and characterization were reported earlier and were  $\geq 95\%$  pure as determined by HPLC/MS or microchemical analysis.

## 7. References

- (1) Liu, Y. L.; Lindert, S.; Zhu, W.; Wang, K.; McCammon, J. A.; Oldfield, E. Taxodione and arenarone inhibit farnesyl diphosphate synthase by binding to the isopentenyl diphosphate site. *Proc Natl Acad Sci U S A* **2014**, *111*, E2530-E2539.
- (2) Mao, J.; Mukherjee, S.; Zhang, Y.; Cao, R.; Sanders, J. M.; Song, Y.; Zhang, Y.; Meints, G. A.; Gao, Y. G.; Mukkamala, D.; Hudock, M. P.; Oldfield, E. Solid-state NMR, crystallographic, and computational investigation of bisphosphonates and farnesyl

diphosphate synthase-bisphosphonate complexes. *Journal of the American Chemical Society* **2006**, *128*, 14485-14497.

(3) Zhang, Y.; Cao, R.; Yin, F.; Hudock, M. P.; Guo, R. T.; Krysiak, K.; Mukherjee, S.; Gao, Y. G.; Robinson, H.; Song, Y.; No, J. H.; Bergan, K.; Leon, A.; Cass, L.; Goddard, A.; Chang, T. K.; Lin, F. Y.; Van Beek, E.; Papapoulos, S.; Wang, A. H.; Kubo, T.; Ochi, M.; Mukkamala, D.; Oldfield, E. Lipophilic bisphosphonates as dual farnesyl/geranylgeranyl diphosphate synthase inhibitors: an X-ray and NMR investigation. *Journal of the American Chemical Society* **2009**, *131*, 5153-5162.

(4) Minor, W.; Cymborowski, M.; Otwinowski, Z.; Chruszcz, M. HKL-3000: the integration of data reduction and structure solution--from diffraction images to an initial model in minutes. *Acta crystallographica. Section D, Biological crystallography* **2006**, *62*, 859-866.

(5) Otwinowski, Z.; Minor, W. Processing of X-ray Diffraction Data Collected in Oscillation Mode. *Methods Enzymol* **1997**, *276*, 307-325.

(6) Winn, M. D.; Ballard, C. C.; Cowtan, K. D.; Dodson, E. J.; Emsley, P.; Evans, P. R.; Keegan, R. M.; Krissinel, E. B.; Leslie, A. G.; McCoy, A.; McNicholas, S. J.; Murshudov, G. N.; Pannu, N. S.; Potterton, E. A.; Powell, H. R.; Read, R. J.; Vagin, A.; Wilson, K. S. Overview of the CCP4 suite and current developments. *Acta crystallographica. Section D, Biological crystallography* **2011**, *67*, 235-242.

(7) Emsley, P.; Lohkamp, B.; Scott, W. G.; Cowtan, K. Features and development of Coot. *Acta crystallographica. Section D, Biological crystallography* **2010**, *66*, 486-501.

(8) Brunger, A. T. Version 1.2 of the Crystallography and NMR system. *Nature protocols* **2007**, *2*, 2728-2733.

(9) Brunger, A. T.; Adams, P. D.; Clore, G. M.; DeLano, W. L.; Gros, P.; Grosse-Kunstleve, R. W.; Jiang, J. S.; Kuszewski, J.; Nilges, M.; Pannu, N. S.; Read, R. J.; Rice, L. M.; Simonson, T.; Warren, G. L. Crystallography & NMR system: A new software suite for macromolecular structure determination. *Acta crystallographica. Section D, Biological crystallography* **1998**, *54*, 905-921.

(10) Schrödinger, LLC. *The PyMOL Molecular Graphics System*, Version 1.3; Schrödinger, LLC, New York: 2013.
